# Supplementary material for: Trends in Representation of Female Applicants and Matriculants in Canadian Residency Programs Across Specialties, 1995 to 2019
Source: PubMed Central journal article supplement (PMC7686870; doi:10.1001/jamanetworkopen.2020.27938), 2020-11-24
Supplement: jamanetwopen-e2027938-s001.pdf [file jamanetwopen-e2027938-s001.pdf]

## Supplemental Online Content

Lorello GR, Silver JK, Moineau G, McCarthy K, Flexman AM. Trends in representation of female applicants and matriculants in Canadian residency programs across specialties, 1995 to 2019. *JAMA Netw Open*. 2020;3(11):e2027938. doi:10.1001/jamanetworkopen.2020.27938

**eTable.** Number of CaRMS Applicants by Specialty, Stratified by Gender

This supplemental material has been provided by the authors to give readers additional information about their work.

**eTable.** Number of CARMS applicants by specialty, stratified by gender.

| Discipline                                  | Total Applicants (n) | Female (n)    | Male (n)      | Female (%)  |
|---------------------------------------------|----------------------|---------------|---------------|-------------|
| <b>Anesthesiology</b>                       | <b>2,463</b>         | <b>1,005</b>  | <b>1,458</b>  | <b>40.8</b> |
| <b>Emergency Medicine</b>                   | <b>1,673</b>         | <b>716</b>    | <b>957</b>    | <b>42.8</b> |
| <b>Family Medicine Grouping</b>             | <b>16,473</b>        | <b>10,333</b> | <b>10,582</b> | <b>62.7</b> |
| Family Medicine                             | 16,224               | 10,171        | 6,053         | 62.7        |
| Community and Public Health                 | 249                  | 162           | 87            | 65.1        |
| <b>Internal Medicine</b>                    | <b>7,905</b>         | <b>3,942</b>  | <b>3,963</b>  | <b>49.9</b> |
| Dermatology                                 | 783                  | 521           | 262           | 66.5        |
| Internal Medicine                           | 7,117                | 3,420         | 3,697         | 48.1        |
| Occupational Medicine                       | 5                    | 1             | 4             | 20.0        |
| <b>Neurology</b>                            | <b>907</b>           | <b>465</b>    | <b>442</b>    | <b>51.3</b> |
| <b>Obstetrics and Gynecology</b>            | <b>2,090</b>         | <b>1,776</b>  | <b>314</b>    | <b>85.0</b> |
| <b>Pathology &amp; Laboratory Medicine</b>  | <b>683</b>           | <b>317</b>    | <b>366</b>    | <b>46.4</b> |
| Anatomical Pathology                        | 280                  | 125           | 155           | 44.6        |
| General Pathology                           | 18                   | 9             | 9             | 50          |
| Hematological Pathology                     | 20                   | 12            | 8             | 60.0        |
| Laboratory Medicine                         | 234                  | 106           | 128           | 45.3        |
| Medical Biochemistry                        | 7                    | 3             | 4             | 42.9        |
| Medical Microbiology                        | 119                  | 60            | 59            | 50.4        |
| Neuropathology                              | 5                    | 2             | 3             | 40.0        |
| <b>Physical Medicine and Rehabilitation</b> | <b>416</b>           | <b>216</b>    | <b>200</b>    | <b>51.9</b> |
| <b>Pediatrics &amp; Medical Genetics</b>    | <b>3,198</b>         | <b>2,427</b>  | <b>771</b>    | <b>75.9</b> |
| Medical Genetics                            | 81                   | 59            | 22            | 72.8        |
| Pediatrics                                  | 3,117                | 2,368         | 749           | 76.0        |
| <b>Psychiatry</b>                           | <b>2,810</b>         | <b>1,663</b>  | <b>1,147</b>  | <b>59.2</b> |
| <b>Radiation Oncology</b>                   | <b>394</b>           | <b>178</b>    | <b>216</b>    | <b>45.2</b> |
| <b>Radiology</b>                            | <b>2,055</b>         | <b>658</b>    | <b>1,397</b>  | <b>32.0</b> |
| Diagnostic Radiology                        | 1,961                | 636           | 1,325         | 32.4        |
| Nuclear Medicine                            | 94                   | 22            | 72            | 23.4        |
| <b>Surgery</b>                              | <b>7,357</b>         | <b>2,711</b>  | <b>4,646</b>  | <b>36.8</b> |
| Cardiac Surgery                             | 206                  | 59            | 147           | 28.6        |
| General Surgery                             | 1,909                | 901           | 1,008         | 47.2        |
| Neurosurgery                                | 394                  | 90            | 304           | 22.8        |
| Ophthalmology                               | 1,026                | 382           | 644           | 37.2        |
| Orthopedic Surgery                          | 1,303                | 324           | 979           | 24.9        |
| Otolaryngology                              | 742                  | 303           | 439           | 40.8        |
| Plastic Surgery                             | 911                  | 423           | 488           | 46.4        |
| Thoracic Surgery                            | 5                    | 0             | 5             | 0           |
| Urology                                     | 773                  | 195           | 578           | 25.2        |
| Vascular Surgery                            | 88                   | 34            | 54            | 38.6        |
| <b>Overall</b>                              | <b>48,424</b>        | <b>26,407</b> | <b>22,017</b> | <b>54.5</b> |
